# Supplementary material for: Parental Origin of Interstitial Duplications at 15q11.2-q13.3 in Schizophrenia and Neurodevelopmental Disorders
Source: PLoS Genet. 2016 May 6;12(5):e1005993. doi: 10.1371/journal.pgen.1005993 (PMC4859484; doi:10.1371/journal.pgen.1005993)
Supplement: S1 Table — Details of abbreviations can be found in the “Coding Key” tab. (XLSX) [file pgen.1005993.s004.xlsx]

## Sheet: Table S1_neuropsychiatric
		Patient source				Demographics			15q11-q13 duplication details							Neuropsychiatric features
No	ID	Publication and/or source	Country	Ascertainment	Family relationship	Sex	Age (y)	Ethnicity	Start	Stop	Size (Mb)	Breakpoints	Genome build	Inheritance of duplication	Parental Origin	Developmental delay/Intellectual disability	Epilepsy/Seizures/EEG	Other neurologic	Psychotic illness	AAO of psychotic illness	Antipsychotic treatment	ASD	Behavioural	Other psychiatric
1	HMG48	Costain et al., 2013	Canada	SZ	Proband	M	50	European	20224763	26723209	6.49	BP1-BP3	hg 18	Unknown	Maternal	WAIS-R (19y): VIQ 87, PIQ 79, FSIQ 82	EEG: excessive non-specific slowing of the background	Stuttering on risperidone	SZ	19	Olanzapine		Antisocial traits, marijuana abuse
2	HMG49	Costain et al., 2013	Canada	SZ	Proband	M	47	European	21192955	26873178	5.68	BP1-BP3	hg 18	Maternal	Maternal	WAIS-R (20y): VIQ 75, PIQ 60; intellectual functioning estimated to be in the borderline range		Stuttering since childhood; echolalia	SZ	20	Clozapine		Antisocial traits, polysubstance abuse
3	Mother of HMG49	Costain et al., 2013	Canada	Transmitting parent	Mother of HMG49	F	70	European	21192955	26873178	5.68	BP1-BP3	hg 18	Unknown	Maternal	WAIS (30y): VIQ 94, PIQ 64, FSIQ estimated to be in the low average range. Nonverbal learning disorder	Epilepsy onset 11 y (Rx with dilantin and phenobarbital), normal EEG (28, 30, and 38y)	Peripheral neuropathy secondary to diabetes, generalized brain atrophy (CT scan at 62y)	SZA	27	Quetiapine and haloperidol		Antisocial traits, alcohol abuse
4	Maternal half sister of HMG49	Costain et al., 2013	Canada	Sibling	Maternal half sister of HMG49	F	43	European	21192955	26873178	5.68	BP1-BP3	hg 18	Maternal	Maternal1	Diagnosed borderline intellectual functioning at 13y, placed in special education, receptive speech delay	Normal EEG (13y)		SZA	19	Quetiapine		Antisocial traits, polysubtance abuse	ADHD
5	HMG50	Costain et al., 2013	Canada	SZ	Proband	M	41	European	21192955	26208003	5.01	BP1-BP3	hg 18	Maternal	Maternal	WISC-R (9y): VIQ 87, PIQ 93, FSIQ 89		Extrapyramidal signs secondary to antipsychotics, including tardive dyskinesia (39y)	SZ	22	Clozapine		Antisocial traits, polysubstance abuse	MDD, ADHD
6	Mother of HMG50	Costain et al., 2013	Canada	Transmitting parent	Mother of HMG50	F	64	European	21192955	26208003	5.01	BP1-BP3	hg 18	Unknown	Maternal	Significant learning difficulties in school (poor recall, borderline to low normal vocabulary). Placed in special education			nil					MDD and anxiety
7	Brother of HMG50	Costain et al., 2013	Canada	Sibling	Brother of HMG50	M	43	European	21192955	26208003	5.01	BP1-BP3	hg 18	Maternal	Maternal1	Learning difficulties in school, placed in special education and work-study program in high school		Dysarticulation requiring speech therapy; motor tics	SZA	20	Risperidone
8	3320	Gawlik M	Germany	SZ	Proband	M	26	European	23683783	31089526	7.4	BP2-BP4	hg 19	De novo	Maternal	FSIQ 62, developmental delay, attended special school		Akinesia	SZ	13			Catatonia, impulsive excitability, aggression
9	2758	Gawlik M	Germany	SZ	Proband	M	18	European	22652330	28535266	5.88	BP1-BP3	hg 19	Maternal	Maternal	FSIQ 86, motor delay noted in childhood, graduated from school, failed apprenticeship, no occupation			SZ	16			Catatonia, mixed states of psychomotor excitement and inhibition with stiff akinesia and parakinetic hyperkinesia, stereotypies
10	2825	Gawlik M	Germany	Transmitting parent	Mother of 2578	F		European	22652330	28535267	5.88	BP1-BP3	hg 19	Unknown	Paternal				healthy
11	3545	Gawlik M	Germany	SZ	Proband	M	21	European	23683783	28182715	4.49	BP2-BP3	hg 19	Maternal	Maternal	FSIQ 75, developmental delay (severity unspecified), attended special school, no occupation		Intermittent hyperkinetic restlessness of extremities	SZ	9			Catatonia, aggression, stereotypies, perseveration, affective tension, chronic mixed states of psychomotor excitement and inhibition
12	3552	Gawlik M	Germany	Transmitting parent	Mother of 3545	F		European	23683783	28182715	4.49	BP2-BP3	hg 19	Unknown	Maternal				SZ				Catatonia
13	4883	Gawlik M	Germany	SZ	Proband	F		European	22784095	29753284	6.9	BP1-BP4	hg 19	De novo	Maternal	FSIQ 67, attended special school, no occupation	EEG: alpha or slow basic rhythm, no focal or epileptiform activity		SZ	16			Catatonia, stereotypes and iterations, intermittent aggressive impulsive behavior, States of psychomotor excitement and stiff psychomotor inhibition
14	NG-12076	Levinson DF et al., 2011		SZ	Proband	M		European	22382000	28506000	6.1	BP2-BP3	hg 19	Unknown	Maternal				SZ	18			Disorganized behaviour
15	42891	Levinson DF et al., 2011		SZ	Proband	M		African-American	22770000	28517000	5.74	BP2-BP3	hg 19	Unknown	Maternal				SZ	11
16	Bonn_Munich1	Priebe et al., 2013	Germany	SZ	Proband	F		European	22416000	28488000	6.07	BP1-BP3	hg 19	Unknown	Paternal	WAIS: FSIQ 72, Hauptschule (regular graduation after 9 years), no further schooling, slight learning disability			SZ	16			Shy and jumpy as a child, difficulty establishing contact; thumb-sucking after age 5y; Polysubstance abuse; Sleep disturbances in childhood; Psychomotor agitation; Disorganized behaviour
17	Bonn_Munich2	Priebe et al., 2013	Germany	SZ	Proband	F		European	23684000	28488000	4.8	BP2-BP3	hg 19	Unknown	Maternal	Realschule (regular graduation after 10 years), apprenticeship not finished			SZ	19			Disorganized behaviour
18	NS840	Aleksic B, Itaru K	Japan	SZ	Proband	F	40	Japanese	22416000	28488000	6.07	BP1-BP3	hg 19	Maternal	Maternal	Intellectual disability (severity unspecified)			SZ
19	NF309	Aleksic B, Itaru K	Japan	Transmitting parent	Mother of NS840	F		Japanese	22416000	28488000	6.07	BP1-BP3	hg 19	Unknown	Paternal				healthy
20	1, Ingason 2011	Ingason et al., 2011	Denmark	SZ	Proband	M		European	20306549	26208861	5.9	BP1-BP3	hg 18	Unknown	Maternal	Developmental delay and intellectual disability (severity unspecified)			SZ	10			Conduct and behavioural disturbances; violent including sadistic attacks
21	2, Ingason 2011	Ingason et al., 2011	Germany	SZ	Proband	M		European	20306549	26208861	5.9	BP1-BP3	hg 18	Unknown	Maternal	FSIQ 81, speech delay, attended special schools		Motor coordination disorder	SZ	18		ASD features	Aggression, disorganized behaviour	Depressive and manic symptoms
22	3, Ingason 2011	Ingason et al., 2011	UK	SZA	Proband	F		European	21240037	26208861	4.96	BP2-BP3	hg 18	Unknown	Maternal	Left main stream school at 16 years			SZA	41
23	4, Ingason 2011	Ingason et al., 2011	UK	SZ	Proband	M		European	21205736	26360355	5.15	BP2-BP3	hg 18	Unknown	Maternal	Intellectual disability (severity unspecified)			SZ	16
24	5, Ingason 2011	Ingason et al., 2011	Iceland	SZ	Proband	F	59	European	20306549	29344873	9.03	BP1-BP4	hg 18	Maternal	Maternal	FSIQ 64-68, developmental delay (severity unspecified), left school age 14			SZ	21				Depressive and manic symptoms
25	6, Ingason 2011	Ingason et al., 2011	Iceland	BD	Proband	F	58	European	20306549	26208861	5.9	BP1-BP3	hg 18	Unknown	Maternal	Developmental delay (severity unspecified), low IQ, left school at age 13			BD	13			Catatonia
26	7, Ingason 2011	Ingason et al., 2011	Iceland	ASD	Proband	F	13	European	20306549	26208861	5.9	BP1-BP3	hg 18	De novo	Maternal	FSIQ 56, global developmental delay		Motor function disorder				ASD
27	Control 1	Ingason et al., 2011	Iceland	Control	Control	F	25	European	21240037	26208861	4.96	BP2-BP3	hg 18	Paternal	Paternal
28	Father of Control 1	Ingason et al., 2011	Iceland	Father of control 1	Transmitting parent	M	72	European	21240037	26208861	4.96	BP2-BP3	hg 18	De novo	Paternal
29	Control 2	Ingason et al., 2011	Iceland	Control	Control	F	48	European	20306549	26208861	5.9	BP1-BP3	hg 18	Unknown	Paternal	IQ=100, GAF=81, dyslexia
30	Control 3	Ingason et al., 2011	Iceland	Control	Control	F	64	European	21240037	26208861	4.96	BP2-BP3	hg 18	Unknown	Maternal			Alzheimer's disease
31	Son of Control 3	Ingason et al., 2011	Iceland	Son of Control 3	Son of Control 3	M	51	European	21240037	26208861	4.96	BP2-BP3	hg 18	Maternal	Maternal assumed
32	Control 4	Ingason et al., 2011	Iceland	Control	Control	F	42	European	20306549	26208861	5.9	BP1-BP3	hg 18	Unknown	Maternal	IQ=84, GAF=90
33	Control 5	Ingason et al., 2011	Iceland	Control	Control	F	18	European	21240037	26208861	4.96	BP2-BP3	hg 18	Unknown	Maternal
34	Ingason, new carrier 4	Ingason et al., 2011	Iceland	ASD	Proband	F	9	European	21240037	26208861	4.96	BP2-BP3	hg 18	De novo	Maternal							ASD
35	Ingason, new carrier 5	Ingason et al., 2011	Iceland	Control	Control	F	91	European	21240037	26208861	4.96	BP2-BP3	hg 18	De novo	Paternal
36	CLOZUK1	Rees et al., 2014	UK	SZ	Proband	M		European	22678398	28530181	5.85	BP1-BP3	hg 19	Unknown	Maternal				SZ		Clozapine
37	CLOZUK2	Rees et al., 2014	UK	SZ	Proband	F		European	22678398	28535266	5.85	BP1-BP3	hg 19	Unknown	Maternal				SZ		Clozapine
38	CLOZUK3	Rees et al., 2014	UK	SZ	Proband	M		European	22678398	29615111	6.93	BP1-BP4	hg 19	Unknown	Maternal				SZ		Clozapine
39	CLOZUK4	Rees et al., 2014	UK	SZ	Proband	F		European	22678398	28535266	5.85	BP1-BP3	hg 19	Unknown	Maternal				SZ		Clozapine
40	CLOZUK5	Rees et al., 2014	UK	SZ	Proband	F		European	22750305	28535266	5.78	BP1-BP3	hg 19	Unknown	Maternal				SZ		Clozapine
41	CLOZUK6	Rees et al., 2014	UK	SZ	Proband	M		European	22750305	28535266	5.78	BP1-BP3	hg 19	Unknown	Maternal				SZ		Clozapine
42	CLOZUK7	Rees et al., 2014	UK	SZ	Proband	F		European	23667412	28535266	4.86	BP2-BP3	hg 19	Unknown	Maternal				SZ		Clozapine
43	CLOZUK8	Rees et al., 2014	UK	SZ	Proband	M		European	23727654	28535266	4.8	BP2-BP3	hg 19	Unknown	Maternal				SZ		Clozapine
44	50320-3	Stergiakouli et al 2012	Cardiff, UK	ADHD	Proband	M	14	European	23683783	28501101	4.81	BP2-BP3	hg 19	Paternal	Paternal	FSIQ 70						Autistic traits		ADHD
45	50320-1	Stergiakouli et al 2013	Cardiff, UK	Transmitting parent	Father of 50320-3	M		European	23683783	28501101	4.81	BP2-BP3	hg 19	Unknown	Maternal	Not assessed for IQ. Working at a low-skilled occupation								MDD
46	1, Ogilvie	Ahn et al. 2013	UK	ASD, DD/ID	Proband	M	8	European	23656936	28526440	4.86	BP2-BP3	hg19	De novo	Paternal	Developmental delay (severity unspecified)						ASD
47	2, Ogilvie	Ahn et al. 2013	UK	ASD	Proband	F	5	European	22765627	28940098	6.16	BP1-BP3	hg19	De novo	Paternal							ASD
48	3, Ogilvie	Ahn et al. 2013	UK	DD/ID	Proband	M	5	European	22765627	28526440	5.76	BP1-BP3	hg 19	De novo	Maternal	Global developmental delay
49	4, Ogilvie	Ahn et al. 2013	UK	DD/ID	Proband	M	3	European	23739357	28526440	4.78	BP2-BP3	hg 19	De novo	Maternal	Speech delay, social skills delay
50	5, Ogilvie	Ahn et al. 2013	UK	ASD, DD/ID	Proband	F	9	European	22318597	28940098	6.62	BP1-BP3	hg 19	Maternal	Maternal	Developmental delay (severity unspecified)						ASD
51	6, Ogilvie	Ahn et al. 2013	UK	DD/ID, epilepsy	Proband	M	21	European	23656935	28526440	4.86	BP2-BP3	hg 19	Maternal	Maternal	Learning difficulties	Epilepsy
52	7, Ogilvie	Ahn et al. 2013	UK	DD/ID	Proband	M	8	European	23656936	28940098	5.28	BP2-BP3	hg 19	Maternal	Maternal	Global developmental delay
53	8, Ogilvie	Ahn et al. 2013	UK	Asperger's syndrome	Proband	F	8	European	23656935	28526440	4.86	BP2-BP3	hg 19	Maternal	Maternal							Asperger's syndrome
54	9, Ogilvie	Ahn et al. 2013	UK	DD/ID	Proband	F	3	European	23085036	28526440	5.44	BP2-BP3	hg 19	Maternal	Maternal	Motor delay		Hypotonia, hyperflexible joints					Short attention span

## Sheet: Coding key
Code	Description
SZ	Schizophrenia
SZA	Schizoaffective disorder
VIQ	Verbal IQ
PIQ	Performance IQ
FSIQ	Full scale IQ
WAIS-R	Wechsler Adult Intelligence Scale Revised
WAIS	Wechsler Adult Intelligence Scale
MDD	Major depressive disorder
ADHD	Attention deficit hyperactivity disorder
EEG	Electroencephalogram
EKG	Electrocardiogram
Dx	Diagnosed
Tx	Treatment/treated
BP	Breakpoints
ASD	Autism spectrum disorder
BD	Bipolar disorder
CHD	Congenital heart defect
y	Years
DD	Developmental delay
ID	Intellectual disability
CM	Congenital malformation
AAO	Age at onset
Red	15q11-q13 duplication originated on the paternal chromosome
GAF	Globas Assessment of Functioninc scale (0-100)
Footnote
1	Methylation testing was not completed on these subjects, however maternal origin of the 15q11.-q13.3 duplication is inferred based on maternal inheritance
in blue:	duplications of paternal origin
